# Supplementary material for: Human Adipose Stem Cells (hASCs) Grown on Biodegradable Microcarriers in Serum- and Xeno-Free Medium Preserve Their Undifferentiated Status
Source: MDPI journal article supplement (doi:10.3390/jfb12020025), 2021-04-16
Supplement: s1 [file s1 › jfb-1107682-supplementary for final.pdf]

## Supplementary Materials for the Materials and Methods Section

**Table S1.** Detailed information of the antibodies used for the flow cytometry measurements

| Name       | # Catalog   | Company           | Concentration for SVF [ng] | Concentration for ASC [ng] |
|------------|-------------|-------------------|----------------------------|----------------------------|
| 7-AAD      | 559925      | Becton Dickinson  | 2.5 µL                     | 2.5 µL                     |
| CD15-FITC  | 332778      | Becton Dickinson  | -                          | 50                         |
| CD34-BV650 | 343624      | BioLegend         | 125                        | -                          |
| CD34-PE    | 130-081-002 | Miltenyi          | -                          | 50                         |
| CD36-APC   | 130-095-475 | Miltenyi          | 55                         | 50                         |
| CD45-PC7   | 304016      | BioLegend         | 125                        | -                          |
| CD61-PE    | IM3605      | Beckman & Coulter | -                          | 50                         |
| CD73-FITC  | 344016      | BioLegend         | 75                         | 50                         |
| CD90-APC   | 328113      | BioLegend         | -                          | 50                         |
| CD105-PE   | 323206      | BioLegend         | -                          | 50                         |
| CD146-PE   | 130-092-853 | Miltenyi          | 34                         | 50                         |
| SYTO™40    | S11351      | Thermo Fisher     | 5 µM                       | -                          |

### Evaluation of cell proliferation

It is often challenging to detach cells efficiently from the MCs on which they grew. For this reason, we developed a protocol based on nuclei count: A cell lysis buffer solution frees the nuclei that can thus be enumerated by flow cytometry. This method also allows assessing the cell cycle status of the collected nuclei. So, it is possible to determine the proliferative status of the cells grown on the MCs.

Protocol: Nuclei count after cell lysis.

1. Collect the MCs + cells from each well and transfer them in 1.5 mL Eppendorf tubes. Rinse each well twice with PBS to recover all the MCs + cells.
2. Centrifuge at 400 g for 5 min at RT.
3. Discard the supernatant and resuspend the pellet (microcarriers + cells) in 1 mL of "Lysis & Nuclei Extraction Buffer" (LNEB; 0,2 M Citric acid + 2% Triton X-100).
4. Incubate 5-10 min at RT and pipette up and down until the cells are completely lysed.
5. Add the lysate to a pluriStrainer Mini 40 µm inserted into a 5 mL Eppendorf tube (pluriSelect, cat. no. 43-10040-60, see figure S1). The strainer separates microcarriers from cell lysate/nuclei. Wash filters twice with LNEB to recover all the nuclei.
6. Centrifuge at 800 g for 5 min at RT (5 mL Eppendorf + filter) to collect the nuclei.
7. Resuspend the pellet (nuclei) in 100 µL of CLNEB.
8. Stain with 7-AAD for 5 min at RT, and analyze by flow cytometry. Nuclei analysis: discrimination between G1, G2, and S phases.

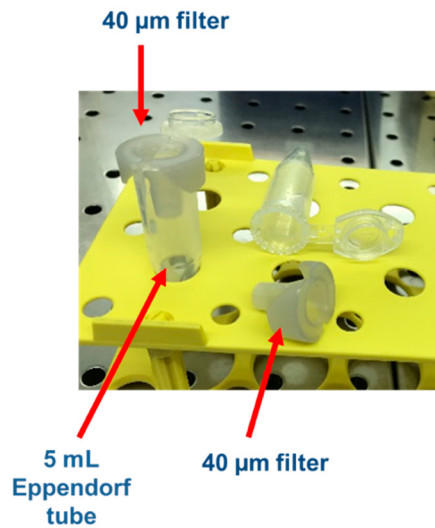

**Figure S1.** A pluriStrainer Mini 40 µm is used to separate MCs from the nuclei. The centrifugal force helps to collect the nuclei quantitatively on the bottom of a 5 mL Eppendorf tube.

**Table S2.** Reverse transcription detailed procedure

| Mix 1            |                   | Mix 2             |                    |
|------------------|-------------------|-------------------|--------------------|
| Reagent          | Amount            | Reagent           | Volume             |
| RNA              | Up to 5 µg        | Buffer 5x         | 2 µL               |
| Oligo dT         | 0.5 µg            | MgCl <sub>2</sub> | 1 µL [2.5 mM]      |
| Random Primers   | 0.5 µg            | dNTPs             | 0.5 µL [0.5 mM]    |
| H <sub>2</sub> O | Final volume 5 µL | Inhibitor RNasi   | 0.25 µL [20 Units] |
|                  |                   | RT Enzyme         | 0.5 µL             |
|                  |                   | H <sub>2</sub> O  | Final volume 5 µL  |

*Procedure:*

Add Mix 1, incubate 5' at 70 °C, cool to 10 °C and incubate 5' in ice.

Add Mix 2 and incubate 5' at 25 °C, 42 °C for 1h, and 70 °C for 15'.

**Table S3.** Primer sequences

| Gene Name     | Forward Primer (5'-3')         | Reverse Primer (5'-3')         |
|---------------|--------------------------------|--------------------------------|
| <i>ACTB</i>   | CTG GAA CGG TGA AGG TGA CA     | AAG GGA CTT CCT GTA ACA ATG CA |
| <i>SOX9</i>   | AGC GAA CGC ACA TCA AGA C      | CTG TAG GCG ATC TGT TGG GG     |
| <i>RUNX2</i>  | TCA ACG ATC TGA GAT TTG TGG G  | GGG GAG GAT TTG TGA AGA CGG    |
| <i>PPARG</i>  | GCT TTC TGG GTG GAC TCA AGT    | GAG GGC AAT CCG TCT TCA TCC    |
| <i>PREF1</i>  | TGA CCA GTG CGT GAC CTC T      | GGC AGT CCT TTC CCG AGT A      |
| <i>ZFP423</i> | GAT CAC TGT CAG CAG GAC TT     | TGC CTC TTC AAG TAG CTC A      |
| <i>ZFP521</i> | GGC TGT TCA AAC ACA AGC G      | GCA CAT TTA TAT GGC TTG TTG    |
| <i>DKK1</i>   | ATA GCA CCT TGG ATG GGT ATTC C | CTG ATGA CCG GAG ACA AAC AG    |

**Table S4.** RT-qPCR cycle conditions

| Phase                | T (°C)   | Time (min) | Repetition |
|----------------------|----------|------------|------------|
| Denaturation         | 95 °C    | 2:00       |            |
| Denaturation         | 95 °C    | 0:05       | X 40       |
| Annealing+ Extension | 60 °C    | 0:20       |            |
| Denaturation         | 95 °C    | 0:05       |            |
| Melting Curve        | 65-95 °C | 18:00      |            |

*Evaluation of growth-related parameters*

Equation used to calculate the growth-related parameters:

(I) Specific growth rate  $\mu$  (Eq. 1)

$$\mu = \frac{\ln(X_A(t)) - \ln(X_A(0))}{\Delta t} \quad (1)$$

Where  $\mu$  is the net specific growth rate.  $X_A(t)$  and  $X_A(0)$  are the cell numbers at the end and the beginning of the exponential growth phase, respectively, and  $t$  is the time.

(II) Doubling time  $t_d$  (Eq. 2)

$$t_d = \frac{\ln(2)}{\mu} \quad (2)$$

Where  $t_d$  is the doubling time,  $\ln(2)$  the binary logarithm of 2, and  $\mu$  the specific growth rate.

(III) Population Doubling Level PDL (Eq. 3)

$$PDL = \frac{1}{\log(2)} \cdot \log\left(\frac{X_A(t)}{X_A(0)}\right) \quad (3)$$

PDL is the number of population doublings, and  $X_A(0)$  and  $X_A(t)$  are the cell numbers at the beginning and end of the cultivation.

(IV) Expansion factor EF (Eq. 4)

$$EF = \frac{X_A(t_{max})}{X_A(t=0)} \quad (4)$$

EF is the expansion factor, and  $X_A(t_{max})$  is the maximum cell number, and  $X_A(t=0)$  is the inoculated cell number.

(V) Lactate yield from glucose  $Y_{Lac/Glc}$  (Eq. 5)

$$Y_{Lac/Glc} = \frac{\Delta Lac}{\Delta Glc} \quad (5)$$

Where  $Y_{Lac/Glc}$  is the lactate yield from glucose,  $\Delta Lac$  is the lactate production over a specific time period, and  $\Delta Glc$  is the glucose consumption over the same time period (= exponential growth phase)

(VI) Specific metabolite flux  $q_{met}$  (Eq. 6)

$$q_{met} = \left(\frac{\mu}{X_A(t)}\right) \left(\frac{C_{met}(t) - C_{met}(0)}{e^{\mu t} - 1}\right) \quad (6)$$

Where  $q_{met}$  is the net specific metabolite consumption or production rate (for Glc, Lac, Amn),  $\mu$  is the specific cell growth rate,  $X_A(t)$  is the cell number at the end of the exponential growth phase;  $C_{met}(t)$  and  $C_{met}(0)$  are the metabolite concentrations at the end and the beginning of the exponential growth phase, respectively, and  $t$  is the time.

**Table S5.** Materials

| Name                                        | # Catalog      | Company                       |
|---------------------------------------------|----------------|-------------------------------|
| Phenol                                      | 327125000      | Acros Organics                |
| CytoFLEX Daily QC Fluorospheres             | B53230         | Beckman & Coulter             |
| VersaComp Antibody Capture Bead Kit         | B22804         | Beckman & Coulter             |
| VersaLyse Lysing Solution                   | B59266AA       | Beckman & Coulter             |
| Sso Advanced Universal SYBR Green Supermix  | 1725271        | Biorad                        |
| Albumin CSL 20%                             | 22918180119611 | CLS Behring                   |
| Privigen Immunoglobulin                     |                | CLS Behring                   |
| Ultra-Low 24 well                           | 3473           | Corning                       |
| Eppendorf Tubes® 5.0 ml                     | 0030119380     | Eppendorf                     |
| 85% Glycerol solution                       | 07-3800-07     | Hänseler AG                   |
| Syringe Filters                             | FPE-204-030    | Jet Biofil                    |
| IRDye®800CW Streptavidin                    | 926-32230      | Li-Cor                        |
| Nucleospin RNA kit                          | 740955.250     | Macherey-Nagel                |
| Microtube mesh 40 µm                        | 43-10040-60    | PluriSelect life science      |
| GoScript Reverse Transcription System       | A5001          | Promega                       |
| Proteome Profiler Human Adipokine Array Kit | ARY024         | R&D Systems                   |
| Chloroform                                  | C2432          | Sigma-Aldrich                 |
| Citric Acid Monohydrate                     | C1909          | Sigma-Aldrich                 |
| DAPI                                        | D9542          | Sigma-Aldrich                 |
| Ethanol                                     | 51976          | Sigma-Aldrich                 |
| Formaldehyde                                | 47608          | Sigma-Aldrich                 |
| Glutaraldehyde                              | G6257          | Sigma-Aldrich                 |
| Guanidine Thiocyanate                       | 50980          | Sigma-Aldrich                 |
| SDS                                         | 74255          | Sigma-Aldrich                 |
| Sodium Chloride                             | S7653          | Sigma-Aldrich                 |
| Triton X-100                                | X100           | Sigma-Aldrich                 |
| Urea                                        | U5378          | Sigma-Aldrich                 |
| PronectinF                                  | Z37866-6       | SIGMA-soloHill                |
| SYTO™40 blue fluorescent nucleic acid stain | S11351         | Thermo Fisher Scientific      |
| Trypan Blue                                 | 15250-061      | Thermo Fisher Scientific      |
| TrypLE Select                               | 12563-029      | Thermo Fisher Scientific      |
| Glucose Bio (for Cedex Bio)                 | 06 343 732 001 | Roche                         |
| Lactate Bio (for Cedex Bio)                 | 06 343 759 001 | Roche                         |
| NH3 Bio (for Cedex Bio)                     | 06 343 775 001 | Roche                         |
| Via1-Cassette (for NucleoCounter NC200)     | 941-0012       | ChemoMetec                    |
| T25 Flask                                   | 90026          | TPP                           |
| T25 Flask                                   | CLS430639      | Sigma Aldrich                 |
| T75 Flask                                   | CLS430720      | Sigma Aldrich                 |
| 125 mL Disposable Spinner flask             | CLS3152        | Sigma Aldrich                 |
| Collagenase Type B AOF                      | LS004147       | Worthington Biochemical Corp. |

## Supplementary Materials for the Results Section

**Table S6.** Percentages of nuclei found in G1, G2, or in S phase.

|              | G1             |                 | S             |               | G2             |                | APP             |                 |
|--------------|----------------|-----------------|---------------|---------------|----------------|----------------|-----------------|-----------------|
|              | BR44           | PNF             | BR44          | PNF           | BR44           | PNF            | BR44            | PNF             |
| <b>Day 1</b> | 42.05 ± 3.70 % | 37.40 ± 11.57 % | 6.10 ± 4.48 % | 5.12 ± 3.12 % | 12.07 ± 4.03 % | 11.43 ± 5.59 % | 42.80 ± 17.05 % | 42.58 ± 14.39 % |
| <b>Day 2</b> | 24.05 ± 4.76 % | 31.92 ± 10.07 % | 3.16 ± 0.89 % | 7.77 ± 2.05 % | 8.64 ± 3.05 %  | 18.04 ± 5.90 % | 48.25 ± 6.09 %  | 82.19 ± 11.96 % |
| <b>Day 4</b> | 27.26 ± 8.10 % | 41.78 ± 2.07 %  | 4.60 ± 2.51 % | 10.87 ± 3.69  | 9.90 ± 4.15 %  | 17.30 ± 6.24 % | 51.60 ± 8.33 %  | 67.77 ± 11.27 % |
| <b>Day 7</b> | 29.29 ± 9.56 % | 42.07 ± 5.95 %  | 4.15 ± 1.33 % | 7.08 ± 0.59 % | 9.98 ± 4.41 %  | 18.34 ± 4.03 % | 47.46 ± 5.81 %  | 61.61 ± 14.83 % |

*Flow cytometry analysis of CD36 and CD146 expressed by adipogenic-induced hASCs*

CD36 is a very useful surface antigen because it labels progenitor cells with a particular susceptibility to undergo terminal adipogenic differentiation. Its expression is correlated with an increase in intracellular neutral lipid content [1,2]. The cell surface marker CD146 is also associated with adipogenic differentiation. Indeed, Graham G. Walmsley et al. showed that hASCs induced to differentiate into adipocytes expressed the CD146 as well as the CD36 markers [3]. Furthermore, Yongting Luo et al. found that macrophagic CD146 promotes foam cell formation and interacts with CD36 to mediate oxidized low-density lipoprotein (oxLDL) uptake [4]. One adipocyte task is to store triglycerides and regulate lipid metabolism. Published studies show that these cells use both CD36 and CD146 for these biological processes. Therefore, both are ideal markers to determine if hASCs spontaneously start to differentiate during the culture time [3,5,6]. Therefore, we wanted to verify if, with our defined xeno- and serum-free culture system, CD36 and CD146 were markers that signal maturation towards the adipogenic line, as described by others. For this purpose, hASCs obtained from three different donors were initially expanded in *UrSuppe* basal medium until confluency was reached. Adipogenic differentiation was then induced with a specifically developed defined medium for ten days. Human ASCs efficiently differentiated into early adipocytes accumulating lipid-containing vesicles that were easily seen under the microscope. After very gently detaching the cells from the cell culture plates, they were labeled with aCD36-APC, aCD146-PE, and analyzed by flow cytometry. The results are shown below in figure S2.

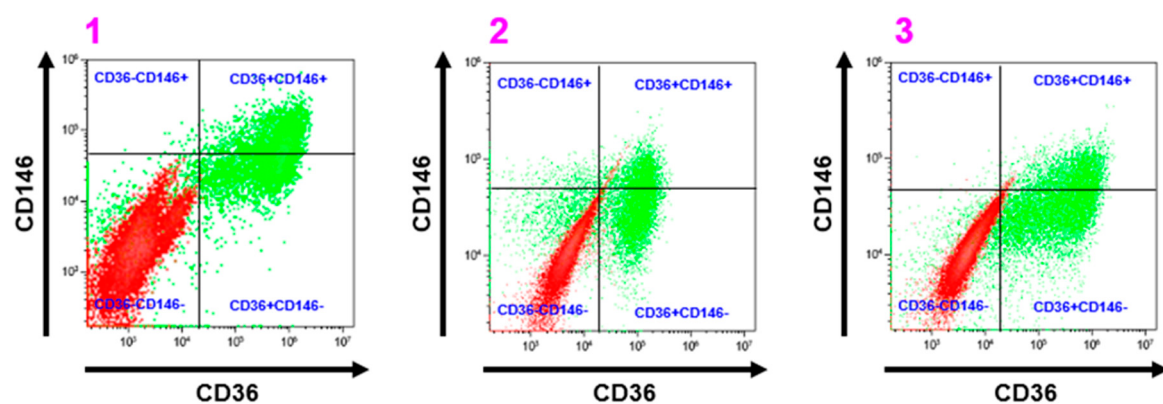

**Figure S2.** Representative flow cytometry analysis of hASCs induced to differentiate into adipocytes. Early adipocytes from three different donors (plots 1,2, and 3) were stained with aCD36-APC and aCD146-PE. Red populations: Isotype controls. Green populations: Tests with aCD36-APC and aCD146-PE.

We confirm with this test that maturing adipocytes can express both CD36 and CD146 surface antigens, and a significant population is a double-positive for these markers. Flow cytometry with adipose tissue cells is notoriously tricky due to their fragility and high autofluorescence. Indeed, Carolina E. Hagberg *et al.* reported that mature adipocytes' analysis requires a modified flow cytometer specifically adapted for this purpose. This included using a larger nozzle (150 mm diameter), lowering the sheath pressure to 6 psi, and enhancing the detection of large-size events [7]. We worked with a standard flow cytometer, so it is possible that we could not analyze the larger and more mature adipocytes, which probably broke inside the device during the data acquisition. Nonetheless, we confirmed that CD36 and CD146 are valuable markers that signal differentiation/maturation of hASCs into adipocytes.

*Flow cytometry analysis of some standard markers expressed by hASCs cultures in 2D or 3D under static conditions*

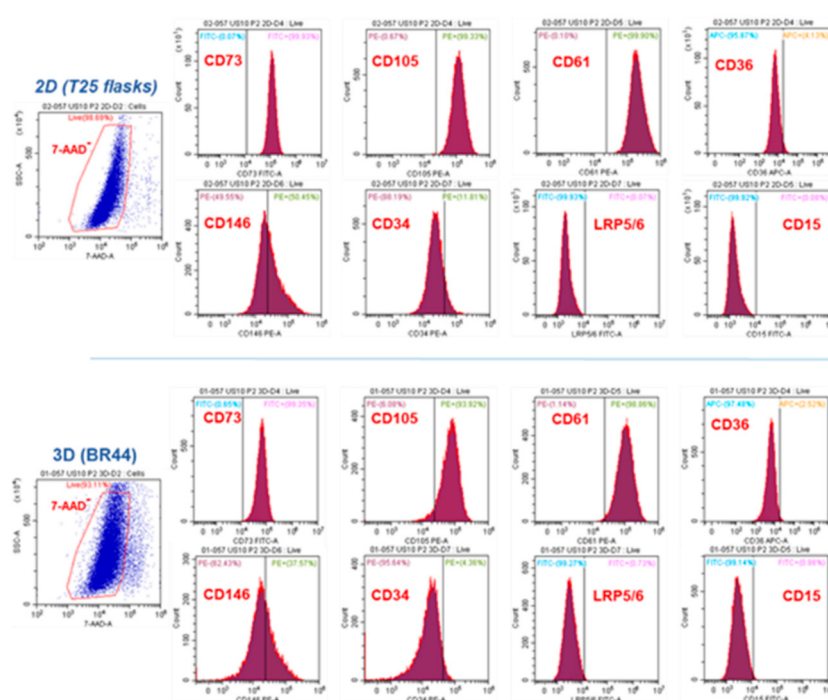

**Figure S3.** Single-parameter histogram for flow cytometry analysis of expanded hASCs. Cells from donor 057\_MaPa at passage P2 stained with labeled antibodies which recognize a panel of standard cell surface markers. Each plot's vertical axis marks the threshold "negative/positive" found with a sample of cells stained with the isotype control antibody. The cells were cultured in SF conditions in standard cell culture vessel (2D, T25 flasks, upper panel) or on the MC prototype BR44 (3D, lower panel).

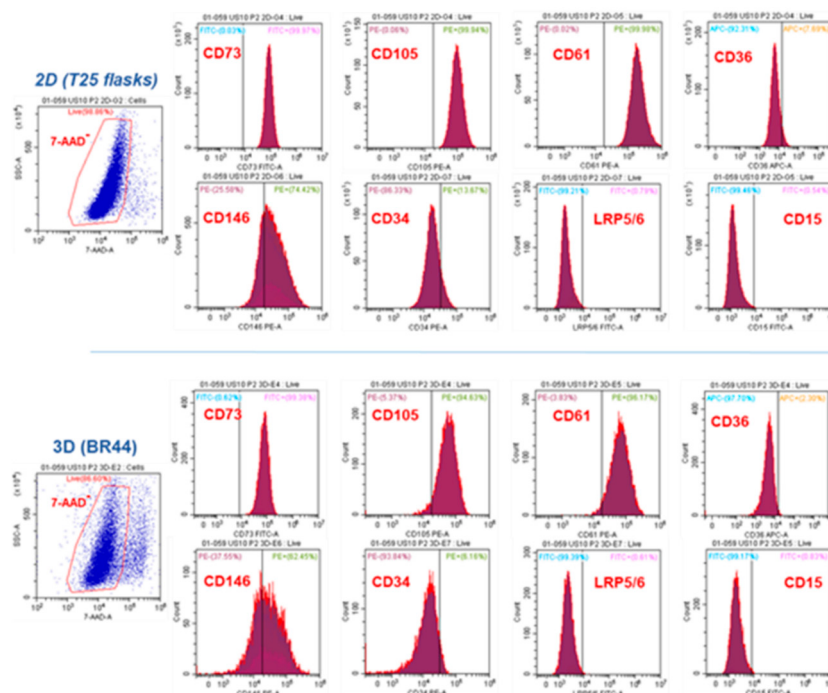

**Figure S4.** Single-parameter histogram for flow cytometry analysis of expanded hASCs. Cells from donor 059\_SeMa at passage P2 stained with labeled antibodies which recognize a panel of standard cell surface markers. Each plot's vertical axis marks the threshold "negative/positive" found with a sample of cells stained with the isotype control antibody. The cells were cultured in SF conditions in standard cell culture vessel (2D, T25 flasks, upper panel) or on the MC prototype BR44 (3D, lower panel).

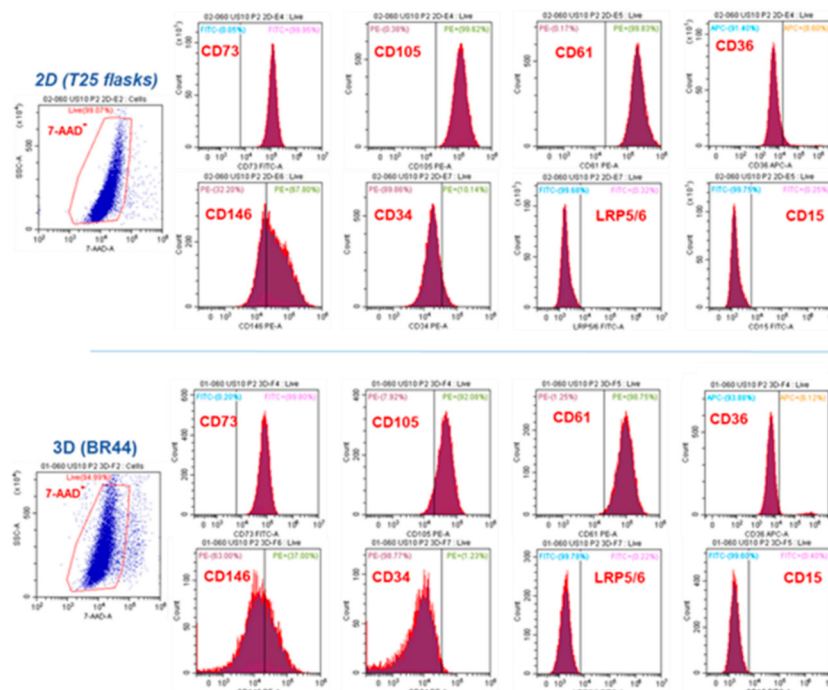

**Figure S5.** Single-parameter histogram for flow cytometry analysis of expanded hASCs from donor 060\_DeMa at passage P2 stained with labeled antibodies recognizing a panel of standard cell surface markers. Each plot's vertical axis marks the threshold "negative/positive" found with a sample of cells stained with the isotype control antibody. The cells were cultured in SF conditions in standard cell culture vessel (2D, T25 flasks, upper panel) or on the MC prototype BR44 (3D, lower panel).

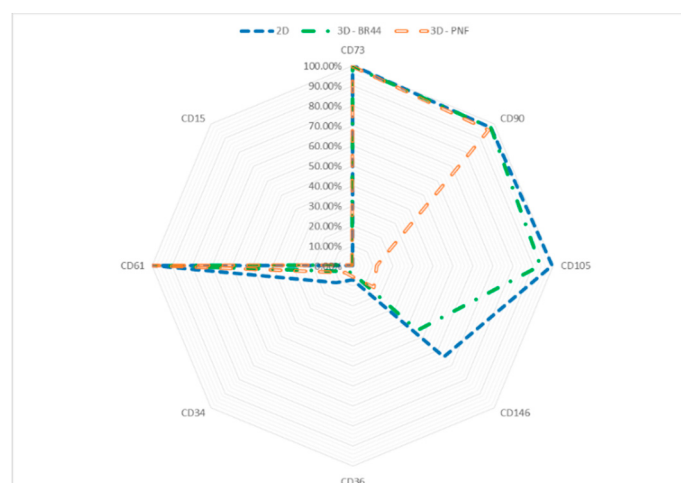

**Figure S6.** Average flow cytometry expression. "Radar Plot" shows the percentage of positive hASCs for the respectively indicated surface marker for cells grown in 2D (T25 flask, blue line), in 3D on BR44 (green line), and in 3D on PNF (orange line).

#### Schematic illustration of adipogenesis

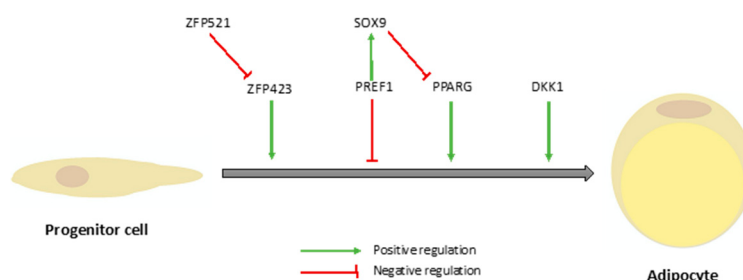

**Figure S7.** Schematic illustration showing the relationship between some critical factors that positively or negatively controls adipogenesis. Two of them are particularly important: PREF1 is known to inhibit adipogenesis, whereas PPARG is considered the master regulator of adipose tissue development and differentiation. The grey arrow represents the various differentiation stages that lead to a mature adipocyte starting from a progenitor cell. Further information and references about the marker genes used can be found in Table S7, and Table S8.

**Table S7.** Overview of measured stemness maintenance genes

| Name                            | Description                                                                                                                                                    | Reference                                               |
|---------------------------------|----------------------------------------------------------------------------------------------------------------------------------------------------------------|---------------------------------------------------------|
| <i>PREF1</i><br>( <i>DLK1</i> ) | Pre-adipocyte factor 1 (Delta-like 1 homolog) is a transmembrane protein that inhibits adipogenesis, and it belongs to the non-canonical Notch ligands family. | Hudak <i>et al.</i> [8]<br>Hei <i>et al.</i> [9]        |
| <i>SOX9</i>                     | Sox9 is a member of the HMG-box class DNA-binding proteins and is a Pref1 target.                                                                              | Wang and Sul [10]                                       |
| <i>ZFP521</i>                   | Zinc Finger Protein 521 is a transcription factor, which inhibits adipogenesis.                                                                                | Chiarella <i>et al.</i> [11]<br>Kang <i>et al.</i> [12] |

**Table S8.** Overview of measured differentiation regulators/markers

| Name          | Description                                                                                                                                                                                                                          | Reference                                                                                                          |
|---------------|--------------------------------------------------------------------------------------------------------------------------------------------------------------------------------------------------------------------------------------|--------------------------------------------------------------------------------------------------------------------|
| <i>PPARG</i>  | Peroxisome Proliferator-Activated Receptor Gamma is a ligand-dependent transcription factor that is a member of the nuclear hormone receptor superfamily. It plays a crucial role in adipose tissue development and differentiation. | Ahmadian <i>et al.</i> [13]<br>Barak <i>et al.</i> [14]<br>Rosen <i>et al.</i> [15]<br>Tontonoz <i>et al.</i> [16] |
| <i>ZFP423</i> | Zinc Finger Protein 423 is responsible for adipogenic commitment. It induces <i>PPARG</i> expression and terminal adipogenic differentiation.                                                                                        | Gupta <i>et al.</i> [17]<br>Gupta <i>et al.</i> [18]                                                               |
| <i>DKK1</i>   | Dickkopf1 inhibits the Wnt signaling and promotes differentiation.                                                                                                                                                                   | Christodoulides <i>et al.</i> [19]<br>Gustafson and Smith [20]                                                     |
| <i>RUNX2</i>  | Runx2 is a transcription factor that is essential for osteoblast differentiation and chondrocyte maturation.                                                                                                                         | Komori [21]<br>Komori [22]                                                                                         |

**Table S9.** Overview of secreted adipokines and chemokines

| Name                                               | Description                                                                                                                                                                       | Reference                                                                               |
|----------------------------------------------------|-----------------------------------------------------------------------------------------------------------------------------------------------------------------------------------|-----------------------------------------------------------------------------------------|
| <i>CathepsinD</i><br><i>CathepsinL</i>             | Proteinases: The Cathepsin family plays a role in intracellular protein catabolism and degrade proteins to activate bioactive proteins' precursors in pre-lysosomal compartments. | Kapur and Katz [23]<br>Taleb <i>et al.</i> [24]                                         |
| <i>IGFB-P4</i><br><i>IGFBP-6</i><br><i>IGFBP-7</i> | The IGFBP family protein's primary function is regulating the availability of insulin-like growth factors (IGFs) in tissue and modulating IGF binding to its receptors.           | Gealekman <i>et al.</i> [25]<br>Haywood <i>et al.</i> [26]<br>Headey <i>et al.</i> [27] |
| <i>CXCL8/IL8</i>                                   | Interleukin 8 is a pro-inflammatory chemokine/cytokine that induces chemotaxis of granulocytes and stimulates phagocytosis.                                                       | Holdsworth and Gan [28]<br>Zlotnik and Yoshie [29]                                      |
| <i>CCL2/MCP-1</i>                                  | Monocyte Chemoattractant Protein 1 is a small cytokine responsible for recruiting monocytes, memory T cells, and dendritic cells to the inflammation site.                        | Holdsworth and Gan [28]<br>Zlotnik and Yoshie [29]                                      |
| <i>M-CSF</i>                                       | Macrophage Colony Stimulating Factor is a secreted cytokine that stimulates macrophage proliferation and activation.                                                              | Holdsworth and Gan [28]<br>Zlotnik and Yoshie [29]                                      |
| <i>MIF</i>                                         | Macrophage Migration Inhibitory Factor is an essential regulator of innate immunity.                                                                                              | Holdsworth and Gan [28]<br>Zlotnik and Yoshie [29]                                      |

---

|                                |                                                                                                                                                                               |                                                    |
|--------------------------------|-------------------------------------------------------------------------------------------------------------------------------------------------------------------------------|----------------------------------------------------|
| <i>IL-6</i>                    | Interleukin 6 acts as a pro-inflammatory cytokine that raises the body's temperature via PGE2 in the hypothalamus and stimulating energy metabolism in fat tissue and muscle. | Holdsworth and Gan [28]<br>Zlotnik and Yoshie [29] |
| <i>Pentraxin-3/<br/>TSG-14</i> | Proteins of the pentraxin family are involved in acute immunological response.                                                                                                | Kapur and Katz [23]<br>Liu <i>et al.</i> [30]      |
| <i>Complement<br/>Factor D</i> | Component of the alternative complement pathway of the innate immune system.                                                                                                  | Kapur and Katz [23]                                |
| <i>Nidogen-1/<br/>Entactin</i> | A structural protein, a component of the basement membrane glycoproteins.                                                                                                     | Kapur and Katz [23]                                |
| <i>TIMP-1</i>                  | Metalloproteinase inhibitor. Involved also in promoting cellular proliferation and anti-apoptotic function.                                                                   | Kapur and Katz [23]                                |
| <i>HGF</i>                     | Growth Factor. Hepatocyte Growth Factor is secreted by mesenchymal stem cells (MSCs) and plays several roles in development, organ regeneration, and wound healing.           | Kapur and Katz [23]                                |
| <i>VEGF</i>                    | Growth factor. Vascular Endothelial Growth Factor is a signal protein that stimulates the formation of blood vessels.                                                         | Kapur and Katz [23]                                |

---

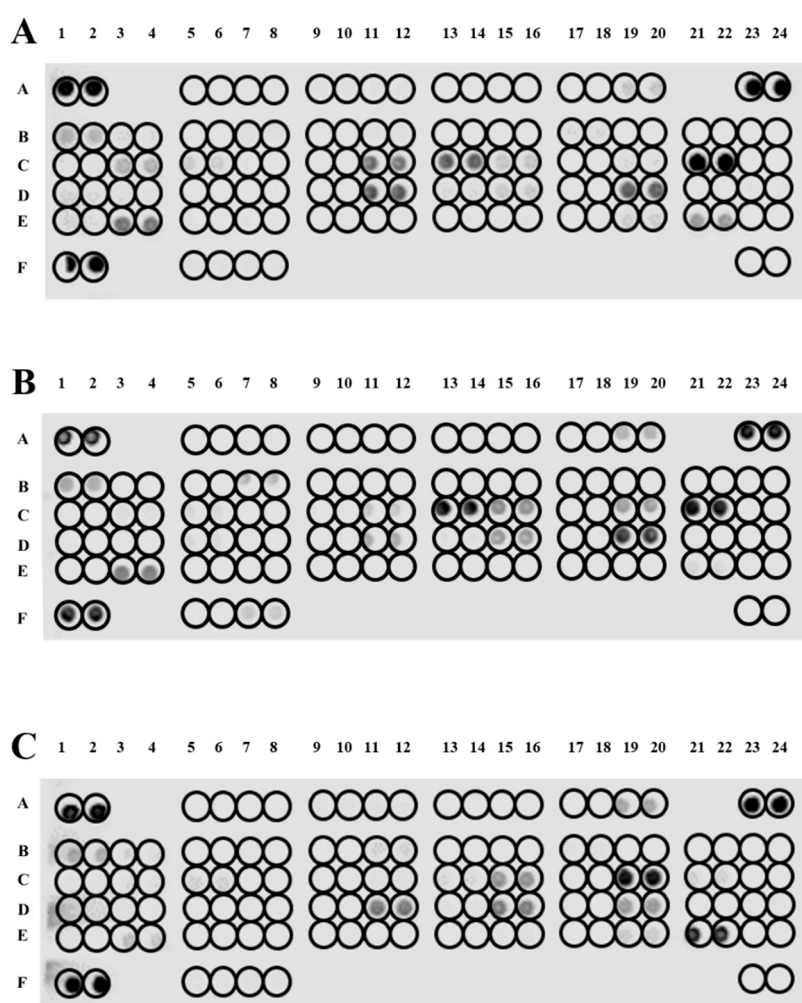

**Figure S8.** Comparing the secretion profile of hASCs. **A:** Profile of hASCs cultured in the classical static 2D cell culture system. **B:** Profile of hASCs grown on BR44 MC in static conditions. **C:** Profile of hASCs grown on BR44 MC in dynamic conditions (spinner flask). Array processing techniques according to the manufacturer of the kit (bio-technie, #ARY024). Evidently, the three secretion patterns are not the same.

**Table S10.** Human adipokine array

**Table/List on the left:** Coordinates and explanations of the 58 different spots present on the commercial human adipokine array membrane.

| Coordinate | Analyte/Control        | Coordinate | Analyte/Control               |
|------------|------------------------|------------|-------------------------------|
| A1, A2     | Reference Spots        | C19, C20   | IL-6                          |
| A5, A6     | Adiponectin/Acrp30     | C21, C22   | CXCL8/IL-8                    |
| A7, A8     | Angiopoietin-1         | C23, C24   | IL-10                         |
| A9, A10    | Angiopoietin-2         | D1, D2     | IL-11                         |
| A11, A12   | Angiopoietin-like 2    | D3, D4     | LAP (TGF- $\beta$ 1)          |
| A13, A14   | Angiopoietin-like 3    | D5, D6     | Leptin                        |
| A15, A16   | BAFF/BLyS/TNFSF13B     | D7, D8     | LIF                           |
| A17, A18   | BMP-4                  | D9, D10    | Lipocalin-2/NGAL              |
| A19, A20   | Cathepsin D            | D11, D12   | CCL2/MCP-1                    |
| A23, A24   | Reference Spots        | D13, D14   | M-CSF                         |
| B1, B2     | Cathepsin L            | D15, D16   | MIF                           |
| B3, B4     | Cathepsin S            | D17, D18   | Myeloperoxidase               |
| B5, B6     | Chemerin               | D19, D20   | Nidogen-1/Entactin            |
| B7, B8     | Complement Factor D    | D21, D22   | Oncostatin M (OSM)            |
| B9, B10    | C-Reactive Protein/CRP | D23, D24   | Pappalysin-1/PAPP-A           |
| B11, B12   | DPPIV/CD26             | E1, E2     | PBEF/Visfatin                 |
| B13, B14   | Endocan                | E3, E4     | Pentraxin-3/SG-14             |
| B15, B16   | EN-RAGE                | E5, E6     | Pref-1/DLK-1/FA1              |
| B17, B18   | Fetuin B               | E7, E8     | Proprotein Convertase 9/PCSK9 |
| B19, B20   | FGF basic              | E9, E10    | RAGE                          |
| B21, B22   | FGF-19                 | E11, E12   | CCL5/RANTES                   |
| B23, B24   | Fibrinogen             | E13, E14   | Resistin                      |
| C1, C2     | Growth Hormone         | E15, E16   | Serpin A8/AGT                 |
| C3, C4     | HGF                    | E17, E18   | Serpin A12                    |
| C5, C6     | ICAM-I/CD54            | E19, E20   | Serpin E1/PAI-1               |
| C7, C8     | IGFBP-2                | E21, E22   | TIMP-1                        |
| C9, C10    | IGFBP-3                | E23, E24   | TIMP-3                        |
| C11, C12   | IGFBP-4                | F1, F2     | Reference Spots               |
| C13, C14   | IGFBP-6                | F5, F6     | TNF- $\alpha$                 |
| C15, C16   | IGFBP-rp1/IGFBP-7      | F7, F8     | VEGF                          |
| C17, C18   | IL-1 $\beta$ /IL-1F2   | F23, F24   | Negative Controls             |

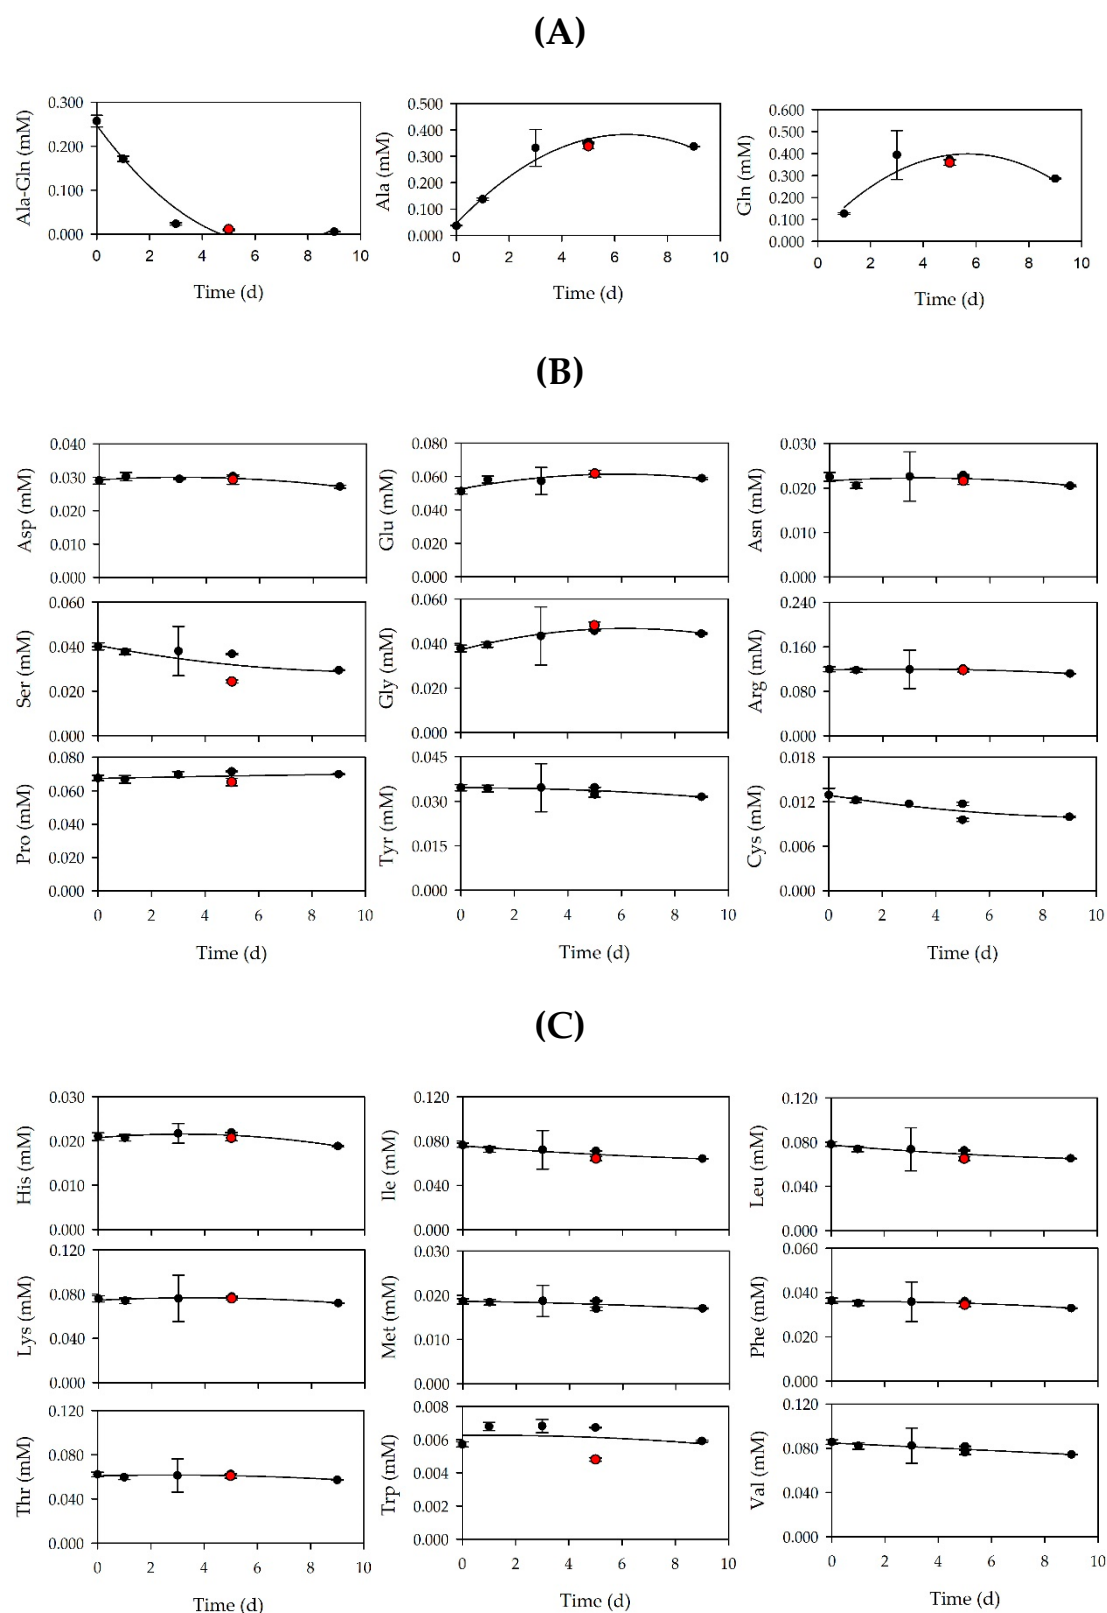

**Figure S9.** Time-dependent profiles of amino acids consumption: **(A)** Ala-Gln dipeptide. Ala and Gln are generated by slitting the dipeptide. **(B)** Non-essential amino acids. **(C)** Essential amino acids. (●) 3D dynamic cell culture system. (●) Standard planar 2D conditions.

**Table S11.** Overview of cell culture results achieved in MC-based expansion processes with serum-free cell culture media.

| Cell type         | Medium                       | MC                        | $\mu$              | $t_d$      | $X_{max}$                  |                                          | EF         | Cultivation system      | Ref.         |
|-------------------|------------------------------|---------------------------|--------------------|------------|----------------------------|------------------------------------------|------------|-------------------------|--------------|
| [-]               | [-]                          | [-]                       | [d <sup>-1</sup> ] | [h]        | [10 <sup>5</sup> cells/mL] | [10 <sup>5</sup> cells/cm <sup>2</sup> ] | [-]        | [-]                     | [-]          |
| hASC              | UrSuppe (SFM)                | ProNectin (PS)            | 0.43 ± 0.1         | 38.7 ± 0.9 | 1.98 ± 0.22                | 0.55 ± 0.6                               | 3.1 ± 0.1  | 125 mL spinner          | [31]         |
| ASC52telo (hTERT) | UrSuppe (SFM)                | ProNectin (PS)            | 0.56               | 29.7       | 7.5                        | 2.08                                     | 21.3       | 125 mL spinner          | [32]         |
| ASC52telo (hTERT) | UrSuppe (SFM)                | BR44 (PLGA)               | 0.35               | 47.5       | 1.2                        | n/a                                      | 7.0        | 125 mL spinner          | [32]         |
| hASC              | UrSuppe (SFM)                | BR44 (PLGA)               | 0.25               | 67.2       | 3.2                        | n/a                                      | 8.1        | 125 mL spinner          | <sup>a</sup> |
| hMSC-TERT         | Stem Cell 1 (SFM)            | Solohill glass coated     | 0.31               | 53.7       | 2.4                        | 0.45                                     | 4.5        | 100 mL spinner          | [33]         |
| hMSC-TERT         | Stem Cell 1 (SFM)            | Corning EA (PS)           | 0.65               | 25.6       | 2.8                        | 0.52                                     | 5.4        | 100 mL spinner          | [33]         |
| hMSC-TERT         | Stem Cell 1 (SFM)            | Corning Synthemax II (PS) | 0.24               | 69.3       | 1.8                        | 0.34                                     | 3.4        | 100 mL spinner          | [33]         |
| hMSC-TERT         | Stem Cell 1 (SFM)            | Solohill ProNectin (PS)   | 0.41               | 40.6       | 1.0                        | 0.19                                     | 1.9        | 100 mL spinner          | [33]         |
| hBM-MSC           | Prime-XV <sup>TM</sup> (SFM) | Plastic P102-L (PS)       | 0.42 ± 0.1         | 39.6 ± 0.9 | 8.1 ± 0.2                  | n/a                                      | 27.0 ± 0.7 | 100 mL spinner          | [34]         |
| hBM-MSC           | Prime-XV <sup>TM</sup> (SFM) | Plastic P102-L (PS)       | 0.41 ± 0.1         | 40.6 ± 0.9 | 8.5 ± 0.2                  | n/a                                      | 28.3 ± 0.6 | ambr 15                 | [34]         |
| hBM-MSC           | Prime-XV <sup>TM</sup> (SFM) | Plastic P102-L (PS)       | 0.7                | 23.8       | 3.5                        | n/a                                      | n/a        | 100 mL spinner          | [35]         |
| hBM-MSC           | Prime-XV <sup>TM</sup> (SFM) | Plastic P102-L (PS)       | 0.52 ± 0.03        | 31.9 ± 1.7 | 6.6 ± 0.5                  | n/a                                      | n/a        | 250 mL DASGIP<br>DASbox | [36]         |
| hBM-MSC           | Prime-XV <sup>TM</sup> (SFM) | Plastic P102-L (PS)       | 0.38 ± 0.02        | 43.8 ± 2.4 | 3.0 ± 0.3                  | n/a                                      | 10.0 ± 0.9 | 100 mL spinner          | [37]         |

<sup>a</sup> = results from the present study, PLGA = Polylactid-co-Glycolid, PS = Polystyrene, EA = Enhanced Attachment

## References

- Christiaens, V.; Van Hul, M.; Lijnen, H.R.; Scroyen, I. CD36 promotes adipocyte differentiation and adipogenesis. *Biochim. Biophys. Acta - Gen. Subj.* **2012**, *1820*, 949–956, doi:10.1016/j.bbagen.2012.04.001.
- Gao, H.; Volat, F.; Sandhow, L.; Galitzky, J.; Nguyen, T.; Esteve, D.; Åström, G.; Mejhert, N.; Ledoux, S.; Thalamas, C.; et al. CD36 Is a Marker of Human Adipocyte Progenitors with Pronounced Adipogenic and Triglyceride Accumulation Potential. *Stem Cells* **2017**, *35*, 1799–1814, doi:10.1002/stem.2635.
- Walmsley, G.G.; Atashroo, D.A.; Maan, Z.N.; Hu, M.S.; Zielins, E.R.; Tsai, J.M.; Duscher, D.; Paik, K.; Tevlin, R.; Marecic, O.; et al. High-Throughput Screening of Surface Marker Expression on Undifferentiated and Differentiated Human Adipose-Derived Stromal Cells. *Tissue Eng. - Part A* **2015**, *21*, 2281–2291, doi:10.1089/ten.tea.2015.0039.
- Luo, Y.; Duan, H.; Qian, Y.; Feng, L.; Wu, Z.; Wang, F.; Feng, J.; Yang, D.; Qin, Z.; Yan, X. Macrophagic CD146 promotes foam cell formation and retention during atherosclerosis. *Cell Res.* **2017**, *27*, 352–372, doi:10.1038/cr.2017.8.
- Festy, F.; Hoareau, L.; Bes-Houtmann, S.; Péquin, A.M.; Gonthier, M.P.; Munstun, A.; Hoarau, J.J.; Césari, M.; Roche, R. Surface protein expression between human adipose tissue-derived stromal cells and mature adipocytes. *Histochem. Cell Biol.* **2005**, *124*, 113–121, doi:10.1007/s00418-005-0014-z.
- Durandt, C.; Van Vollenstee, F.A.; Dessels, C.; Kallmeyer, K.; De Villiers, D.; Murdoch, C.; Potgieter, M.; Pepper, M.S. Novel flow cytometric approach for the detection of adipocyte subpopulations during adipogenesis. *J. Lipid Res.* **2016**, *57*, 729–742, doi:10.1194/jlr.D065664.
- Hagberg, C.E.; Li, Q.; Kutschke, M.; Bhowmick, D.; Kiss, E.; Shabalina, I.G.; Harms, M.J.; Shilkova, O.; Kozina, V.; Nedergaard, J.; et al. Flow Cytometry of Mouse and Human Adipocytes for the Analysis of Browning and Cellular Heterogeneity. *Cell Rep.* **2018**, *24*, 2746–2756.e5, doi:10.1016/j.celrep.2018.08.006.
- Hudak, C.S.; Gulyaeva, O.; Wang, Y.; Park, S. min; Lee, L.; Kang, C.; Sul, H.S. Pref-1 marks very early mesenchymal precursors required for adipose tissue development and expansion. *Cell Rep.* **2014**, *8*, 678–687, doi:10.1016/j.celrep.2014.06.060.
- Hei, S.S. Minireview: Pref-1: Role in adipogenesis and mesenchymal cell fate. *Mol. Endocrinol.* **2009**, *23*, 1717–1725, doi:10.1210/me.2009-0160.
- Wang, Y.; Sul, H.S. Pref-1 Regulates Mesenchymal Cell Commitment and Differentiation through Sox9. *Cell Metab.* **2009**, *9*, 287–302, doi:10.1016/j.cmet.2009.01.013.
- Chiarella, E.; Aloisio, A.; Codispoti, B.; Nappo, G.; Scicchitano, S.; Lucchino, V.; Montalcini, Y.; Camarotti, A.; Galasso, O.; Greco, M.; et al. ZNF521 Has an Inhibitory Effect on the Adipogenic Differentiation of Human Adipose-Derived Mesenchymal Stem Cells. *Stem cell Rev. reports* **2018**, *14*, 901–914, doi:10.1007/s12015-018-9830-0.
- Kang, S.; Akerblad, P.; Kiviranta, R.; Gupta, R.K.; Kajimura, S.; Griffin, M.J.; Min, J.; Baron, R.; Rosen,

- E.D. Regulation of Early Adipose Commitment by Zfp521. *PLoS Biol.* **2012**, *10*, e1001433, doi:10.1371/journal.pbio.1001433.
13. Ahmadian, M.; Suh, J.M.; Hah, N.; Liddle, C.; Atkins, A.R.; Downes, M.; Evans, R.M. PPAR  $\gamma$  signaling and metabolism : the good , the bad and the future. *Nat. Med.* **2013**, *19*, 557–566, doi:10.1038/nm.3159.
  14. Barak, Y.; Nelson, M.C.; Ong, E.S.; Jones, Y.Z.; Ruiz-Lozano, P.; Chien, K.R.; Koder, A.; Evans, R.M. PPAR $\gamma$  is required for placental, cardiac, and adipose tissue development. *Mol. Cell* **1999**, *4*, 585–595, doi:10.1016/S1097-2765(00)80209-9.
  15. Rosen, E.D.; Sarraf, P.; Troy, A.E.; Bradwin, G.; Moore, K.; Milstone, D.S.; Spiegelman, B.M.; Mortensen, R.M. PPAR $\gamma$  is required for the differentiation of adipose tissue in vivo and in vitro. *Mol. Cell* **1999**, *4*, 611–617, doi:10.1016/S1097-2765(00)80211-7.
  16. Tontonoz, P.; Hu, E.; Spiegelman, B.M. Stimulation of adipogenesis in fibroblasts by PPAR $\gamma$ 2, a lipid-activated transcription factor. *Cell* **1994**, *79*, 1147–1156, doi:10.1016/0092-8674(94)90006-X.
  17. Gupta, R.K.; Arany, Z.; Seale, P.; Mepani, R.J.; Ye, L.; Conroe, H.M.; Roby, Y.A.; Kulaga, H.; Reed, R.R.; Spiegelman, B.M. Transcriptional control of preadipocyte determination by Zfp423. *Nature* **2010**, *464*, 619–623, doi:10.1038/nature08816.
  18. Gupta Rana K. et al. Zfp423 expression identifies committed preadipocytes and localizes to adipose endothelial and perivascular cells. *Cell Metab.* **2012**, *15*, 230–239, doi:10.1016/j.cmet.2012.01.010.
  19. Christodoulides, C.; Laudes, M.; Cawthorn, W.P.; Schinner, S.; Soos, M.; O’Rahilly, S.; Sethi, J.K.; Vidal-Puig, A. The Wnt antagonist Dickkopf-1 and its receptors are coordinately regulated during early human adipogenesis. *J. Cell Sci.* **2006**, *119*, 2613–2620, doi:10.1242/jcs.02975.
  20. Gustafson, B.; Smith, U. The WNT Inhibitor Dickkopf 1 and Bone Morphogenetic Protein 4 Rescue Adipogenesis in Hypertrophic Obesity in Humans. *Diabetes* **2012**, *61*, 1217–1224, doi:10.2337/db11-1419.
  21. Toshihisa, K. Molecular Mechanism of Runx2-Dependent Bone Development. *Mol. Cells* **2020**, *43*, 168–175, doi:10.14348/molcells.2019.0244.
  22. Komori, T. Runx2, an inducer of osteoblast and chondrocyte differentiation. *Histochem. Cell Biol.* **2018**, *149*, 313–323, doi:10.1007/s00418-018-1640-6.
  23. Kapur, S.K.; Katz, A.J. Review of the adipose derived stem cell secretome. *Biochimie* **2013**, *95*, 2222–2228, doi:10.1016/j.biochi.2013.06.001.
  24. Taleb, S.; Canello, R.; Cle, K.; Lacasa, D. Cathepsin S promotes human preadipocyte differentiation: possible involvement of fibronectin degradation. *Endocrinology* **2006**, *147*, 4950–4959, doi:10.1210/en.2006-0386.
  25. Gealekman, O.; Gurav, K.; Chouinard, M.; Straubhaar, J.; Thompson, M.; Malkani, S.; Hartigan, C.; Corvera, S. Control of Adipose Tissue Expandability in Response to High Fat Diet by the Insulin-like Growth Factor-binding Protein-4. *J. Biol. Chem.* **2014**, *289*, 18327–18338, doi:10.1074/jbc.M113.545798.

26. Haywood, N.J.; Slater, T.A.; Matthews, C.J.; Wheatcroft, S.B. The insulin like growth factor and binding protein family: Novel therapeutic targets in obesity & diabetes. *Mol. Metab.* **2019**, *19*, 86–96, doi:10.1016/j.molmet.2018.10.008.
27. Headey, S.J.; Leeding, K.S.; Norton, R.S.; Bach, L.A. Contributions of the N- and C-terminal domains of IGF binding protein-6 to IGF binding. *J. Mol. Endocrinol.* **2004**, *33*, 377–386, doi:10.1677/jme.1.01547.
28. Holdsworth, S.R.; Gan, P. Cytokines: Names and Numbers You Should Care About. *Clin. J. Am. Soc. Nephrol.* **2015**, *10*, 2243–2254, doi:10.2215/CJN.07590714.
29. Zlotnik, A.; Yoshie, O. The Chemokine Superfamily Revisited. *Immunity* **2012**, *36*, 705–716, doi:10.1016/j.immuni.2012.05.008.
30. Liu, S.; Qu, X.; Liu, F.; Wang, C. Pentraxin 3 as a Prognostic Biomarker in Patients with Systemic Inflammation or Infection. *Mediators Inflamm.* **2014**, *2014*, 1–9, doi:10.1155/2014/421429.
31. Jossen, V.; Muoio, F.; Panella, S.; Harder, Y.; Tallone, T.; Eibl, R. An Approach towards a GMP Compliant In-Vitro Expansion of Human Adipose Stem Cells for Autologous Therapies. *Bioengineering* **2020**, *7*, 77, doi:10.3390/bioengineering7030077.
32. Muoio, F.; Panella, S.; Lindner, M.; Jossen, V.; Harder, Y.; Moccetti, T.; Eibl, R.; Müller, M.; Tallone, T. Development of a Biodegradable Microcarrier for the Cultivation of Human Adipose Stem Cells (hASCs) with a Defined Xeno- and Serum-Free Medium. *Appl. Sci.* **2021**, *11*, 925, doi:10.3390/app11030925.
33. Leber, J.; Barekzai, J.; Blumenstock, M.; Pospisil, B.; Salzig, D.; Czermak, P. Microcarrier choice and bead-to-bead transfer for human mesenchymal stem cells in serum-containing and chemically defined media. *Process Biochem.* **2017**, *59*, 255–265, doi:10.1016/j.procbio.2017.03.017.
34. Rafiq, Q.A.; Hanga, M.P.; Heathman, T.R.J.; Coopman, K.; Nienow, A.W.; Williams, D.J.; Hewitt, C.J. Process development of human multipotent stromal cell microcarrier culture using an automated high-throughput microbioreactor. *Biotechnol. Bioeng.* **2017**, *114*, 2253–2266, doi:10.1002/bit.26359.
35. Rafiq, Q.A.; Ruck, S.; Hanga, M.P.; Heathman, T.R.J.; Coopman, K.; Nienow, A.W.; Williams, D.J.; Hewitt, C.J. Qualitative and quantitative demonstration of bead-to-bead transfer with bone marrow-derived human mesenchymal stem cells on microcarriers: Utilising the phenomenon to improve culture performance. *Biochem. Eng. J.* **2018**, *135*, 11–21, doi:10.1016/j.bej.2017.11.005.
36. Heathman, T.R.J.; Nienow, A.W.; Rafiq, Q.A.; Coopman, K.; Bo Kara; Hewitt, C.J. Development of a process control strategy for the serum-free microcarrier expansion of human mesenchymal stem cells towards cost-effective and commercially viable manufacturing. *Biochem. Eng. J.* **2019**, *141*, 200–209, doi:10.1016/j.bej.2018.10.018.
37. Heathman, T.R.J.; Glyn, V.A.M.; Picken, A.; Rafiq, Q.A.; Coopman, K.; Nienow, A.W.; Kara, B.; Hewitt, C.J. Expansion, harvest and cryopreservation of human mesenchymal stem cells in a serum-free microcarrier process. *Biotechnol. Bioeng.* **2015**, *112*, 1696–1707, doi:10.1002/bit.25582.

and institutional affiliations.

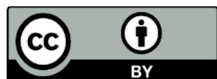

© 2021 by the authors. Submitted for possible open access publication under the terms and conditions of the Creative Commons Attribution (CC BY) license (<http://creativecommons.org/licenses/by/4.0/>).
